# Supplementary material for: Chitin Oligosaccharide Modulates Gut Microbiota and Attenuates High-Fat-Diet-Induced Metabolic Syndrome in Mice
Source: Mar Drugs. 2018 Feb 19;16(2):66. doi: 10.3390/md16020066 (PMC5852494; doi:10.3390/md16020066)
Supplement: Supplementary file 1 [file marinedrugs-16-00066-s001.pdf]

# **Chitin Oligosaccharide Modulates Gut Microbiota and Attenuates High-Fat-Diet-Induced Metabolic Syndrome in Mice**

## **Supplementary Information**

### **Files in this data supplement**

Supplementary Materials and Methods

Supplementary tables

Supplementary figures

## **Supplementary Materials and Methods**

### **Preparation of Chitin Oligosaccharides (NACOS)**

Chitin was extracted from crab shells, and the chitosan sample was made by Qingdao Kading Co., China. NACOS was made by our laboratory. Briefly, 5 g of chitosan oligosaccharides (300–1700 Da) were dissolved in 50 mL of water and reacted with a mixture of 4.37 ml acetic anhydride and 0.1 g of 4-dimethyl aminopyridine in 3 mL of methanol at 60 °C for 4 h. Next, the reaction mixture was precipitated with five-fold acetone (v/v). After further washing with acetone, three times, the gray-white powder product, i.e., NACOS, was dried under a vacuum for 2 h. Finally, the acetylation degree (97%) and polymeration degree (2–6) of NACOS was identified by LC-MS analysis (Figure S1).

### **Oil Red O staining**

Liver tissues fixed in 4% paraformaldehyde were sliced and trimmed into serial sections. After being deparaffinized in xylene and rehydrated through ascending ethanol series, sections were stained with Oil Red O solution for 15 min and then counterstained with hematoxylin for 1 min. The slides were observed under a Leica DMI4000 B light microscope (Wetzlar, Germany).

## Supplementary tables

**Table S1.** Ingredients of control diet (CD) and high-fat diet (HFD) in the mouse experiment.

| Ingredient                            | Control Diet |      | High-Fat Diet |      |
|---------------------------------------|--------------|------|---------------|------|
|                                       | Gram         | Kcal | Gram          | Kcal |
| Casein, 80 Mesh                       | 200          | 800  | 200           | 800  |
| L-Cystine                             | 3            | 12   | 3             | 12   |
| Corn Starch                           | 315          | 1260 | 72.8          | 291  |
| Maltodextrin 10                       | 35           | 140  | 100           | 400  |
| Sucrose                               | 350          | 1400 | 172.8         | 691  |
| Cellulose, BW200                      | 50           | 0    | 50            | 0    |
| Soybean Oil                           | 25           | 225  | 25            | 225  |
| Lard                                  | 20           | 180  | 177.5         | 1598 |
| Mineral Mix S10026                    | 10           | 0    | 10            | 0    |
| Dicalcium Phosphate                   | 13           | 0    | 13            | 0    |
| Calcium Carbonate                     | 5.5          | 0    | 5.5           | 0    |
| Potassium Citrate, 1 H <sub>2</sub> O | 16.5         | 0    | 16.5          | 0    |
| Vitamin Mix V10001                    | 10           | 40   | 10            | 40   |
| Choline Bitartrate                    | 2            | 0    | 2             | 0    |
| FD&C Red Dye #40                      | 0.05         | 0    | 0.05          | 0    |

**Table S2.** Primers used in this study.

| Primers        | Forward Primer            | Reverse Primer           |
|----------------|---------------------------|--------------------------|
| Actin          | AGGTGACAGCATTGCTTCTG      | GCTGCCTCAACACCTCAAC      |
| IL-6           | GAAACCGCTATGAAGTTCCTCTCTG | TGTTGGGAGTGGTATCCTCTGTGA |
| TNF- $\alpha$  | AGGGTCTGGGCCATAGAACT      | CCACCACGCTCTTCTGTCTAC    |
| MCP-1          | GGGATCATCTTGCTGGTGAA      | AGGTCCCTGTCATGCTTCTG     |
| Scd-1          | TTCTTGCGATACACTCTGGTGC    | CGGGATTGAATGTTCTTGTCGT   |
| C/EBP $\alpha$ | CAAGAACAGCAACGAGTACCG     | GTCACTGGTCAACTCCAGCAC    |
| PPAR $\alpha$  | CCCTGCCATTGTTAAGACC       | TGCTGCTGTTCTGTTTC        |
| PPAR $\gamma$  | CTCCAAGAATACCAAAGTGCGA    | GCCTGATGCTTTATCCCCACA    |
| G6Pase         | CGACTCGCTATCTCCAAGTGA     | GTTGAACCAGTCTCCGACCA     |
| PEPCK          | CTGCATAACGGTCTGGACTTC     | CAGCAACTGCCCCGTACTCC     |
| Leptin         | GCCAGGCTGCCAGAATTG        | CTGCCCCCAGTTTGATG        |

**Table S3.** Recovery rates of spiking control for LPS ELISA assay.

| LPS(ng/ml) | OD Value | Concentration (ng/ml) | Recovery Rate (%) |
|------------|----------|-----------------------|-------------------|
| 0.0        | 1.2242   | -0.3                  |                   |
| 10.0       | 1.1803   | 9.8                   | 98.2              |
| 25.0       | 1.1318   | 24.3                  | 97.2              |
| 50.0       | 1.0340   | 52.8                  | 105.7             |
| 100.0      | 0.8573   | 104.8                 | 104.8             |
| 250.0      | 0.3623   | 250.5                 | 100.2             |

## Supplementary figures

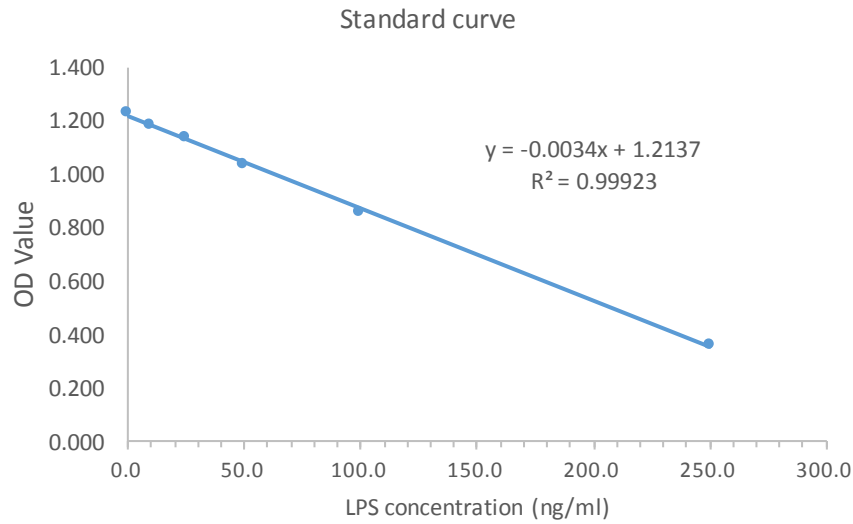

**Figure S1.** Standard curve of LPS ELISA assay, and LPS with different concentrations used as spiking control.

### 10. CERTIFICATE OF ANALYSIS

- 1) In the same lot CV%: 4.4, 5.6
- 2) Different lot CV%: 6.6, 7.9
- 3) Spike Recovery: 94-103%
- 4) Linearity:

|      | Range %  |
|------|----------|
| 1:2  | 96 – 101 |
| 1:4  | 93 - 107 |
| 1:8  | 92 - 100 |
| 1:16 | 96 - 108 |

- 5) Sensitivity: The sensitivity in this assay is 1.0 ng/ml.

**Figure S2.** Intra- & inter individual assay variation (CV) of LPS ELISA kit (E03L0268, BlueGene Biotech, China).

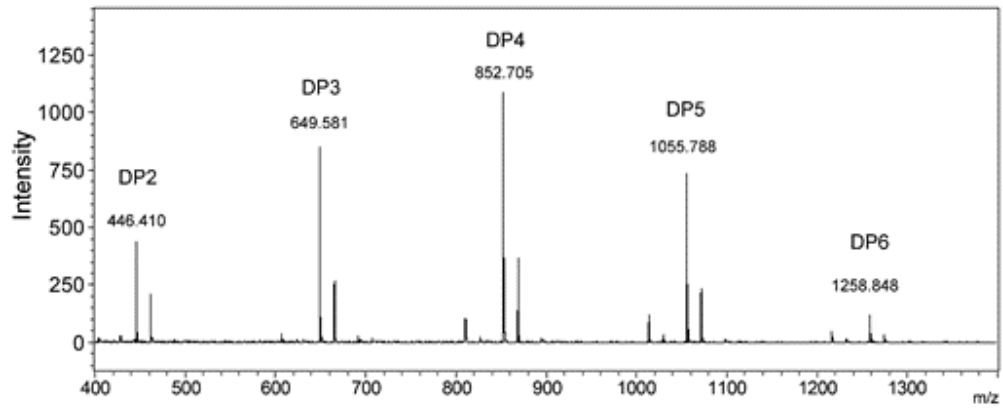

**Figure S3.** LC-MS spectrum of NACOS. DP, degree of polymerization.

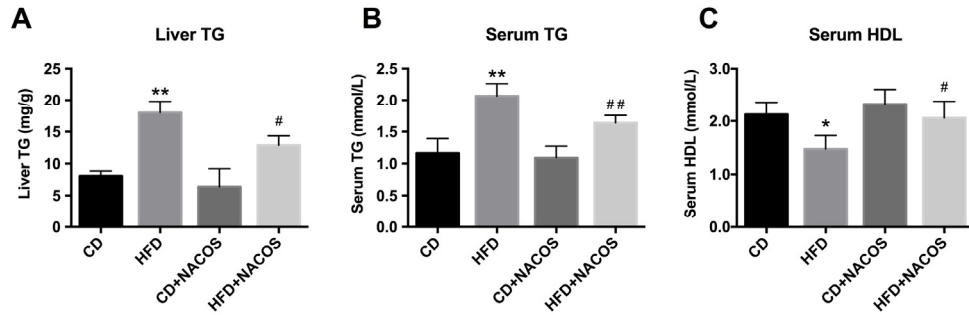

**Figure S4.** Improvement of NACOS on lipid level in liver and blood of HFD-fed mice. Mice were fed with CD, HFD, CD + NACOS (1 mg/ml, in drinking water), or HFD + NACOS for five months. After that, mice were sacrificed, and blood and liver tissues were collected. Liver triglyceride (**A**), serum triglyceride (**B**), and serum high-density lipoprotein (**C**) were determined. TG, triglyceride; HDL, high-density lipoprotein-cholesterol. Data are represented as means  $\pm$  SD ( $n = 5$ ). \* $P < 0.05$ , \*\* $P < 0.01$  compared to CD group; # $P < 0.05$ , ## $P < 0.01$  compared to HFD group.

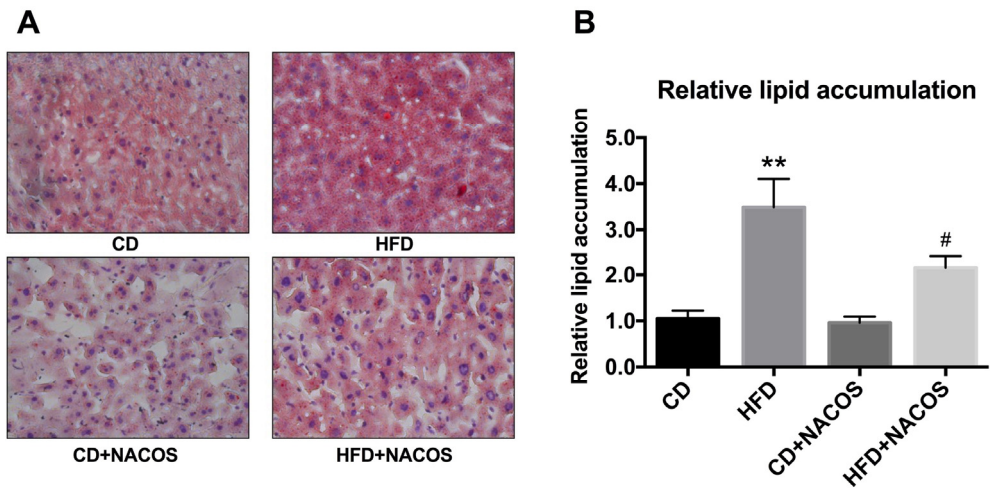

**Figure S5.** Inhibition of NACOS on lipid accumulation in liver tissues of HFD-treated mice. (A) Histological photograph of Oil Red O staining; (B) quantification of lipid accumulation in liver tissues. Red, lipid droplets; blue, nuclei. Data are represented as means  $\pm$  SD ( $n = 5$ ). \* $P < 0.05$ , \*\* $P < 0.01$  compared to CD group; # $P < 0.05$  compared to HFD group.

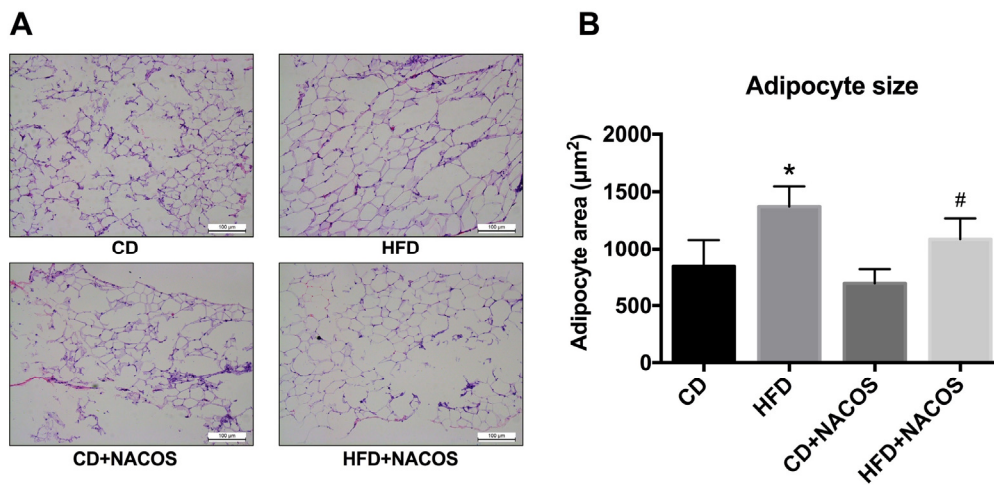

**Figure S6.** Suppressive effect of NACOS on increment of adipocyte size in abdominal adipose tissues of HFD-treated mice. (A) Histological photograph of H&E staining; (B) corresponding quantitative results of (A). Data are represented as means  $\pm$  SD ( $n = 5$ ). \* $P < 0.05$  compared to CD group; # $P < 0.05$  compared to HFD group.

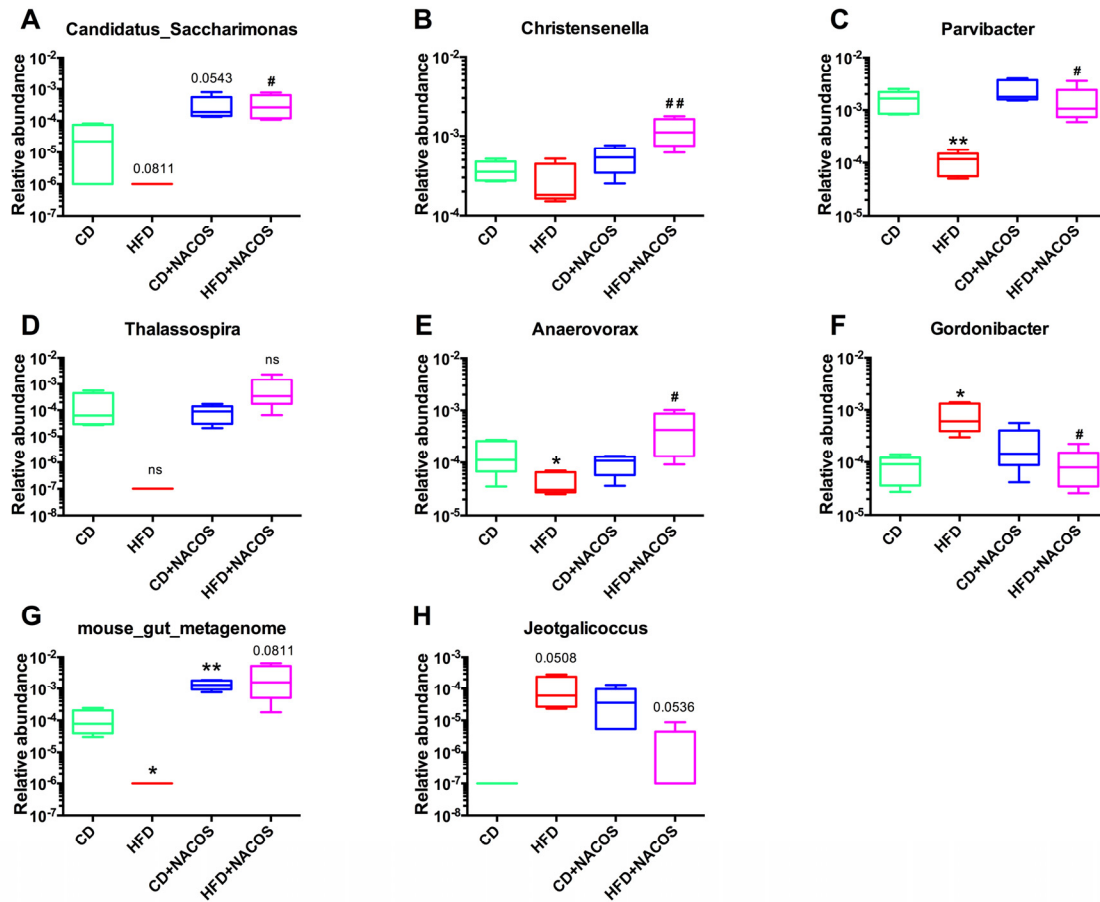

**Figure S7.** Effect of NACOS on the relative population of gut microbial bacteria with low abundance in mice after HFD treatment at genus level, including *Candidatus\_Saccharimonas* (A), *Christensenella* (B), *Parvibacter* (C), *Thalassospira* (D), *Anaerovorax* (E), *Gordonibacter* (F), *Mouse\_gut\_metagenome* (G), and *Jeotgalicoccus* (H). Data are represented as means  $\pm$  SD ( $n = 5$ ). \* $P < 0.05$ , \*\* $P < 0.01$  compared to CD group; # $P < 0.05$ , ## $P < 0.01$  compared to HFD group.
